# Supplementary material
Source: publisher site journal article supplement (https://www.dovepress.com/article/292388)
Supplement: Supplementary file 1 [file get_supplementary_file.php]

**Supplementary material: Figure S1**

**A**

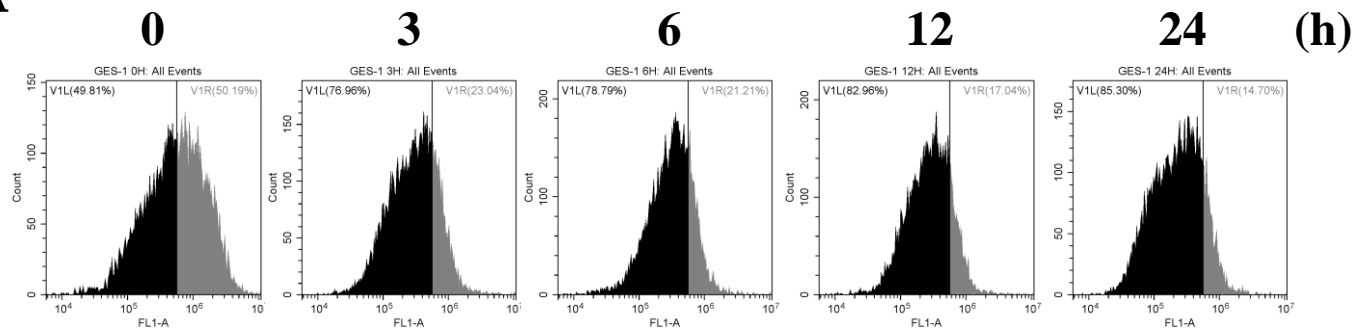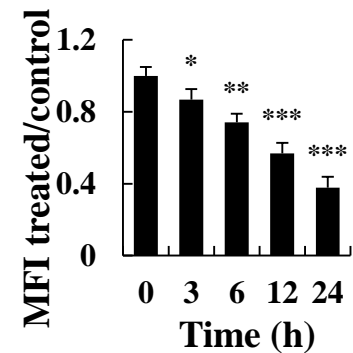

**B**

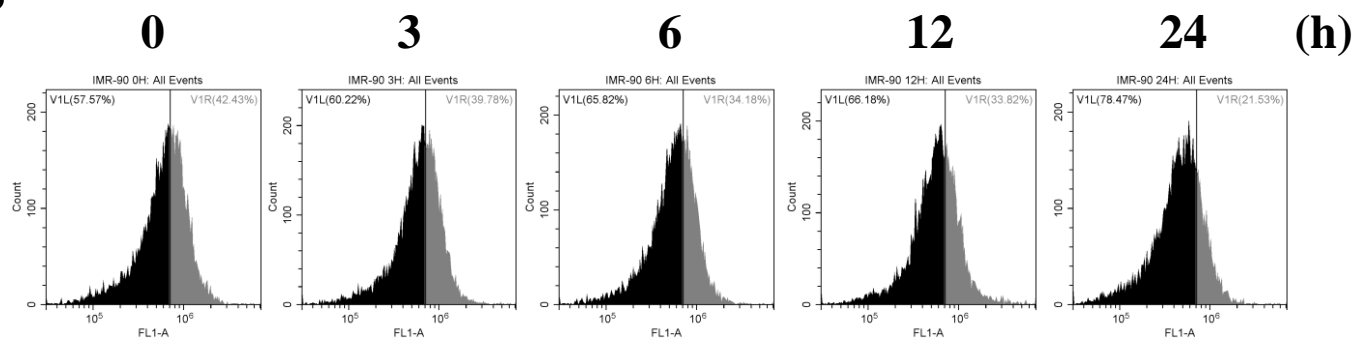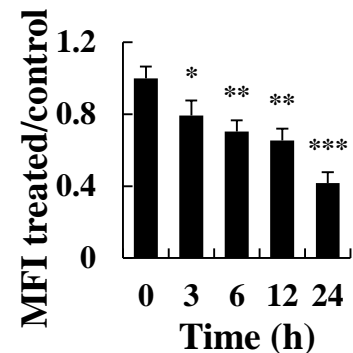

**C**

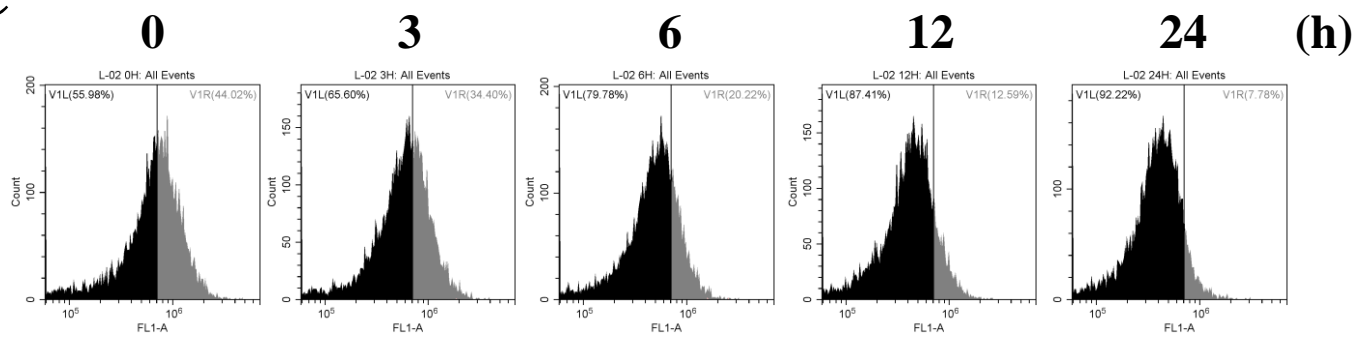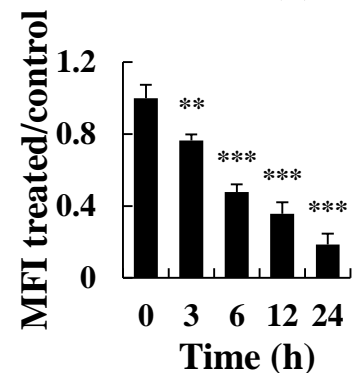

**D**

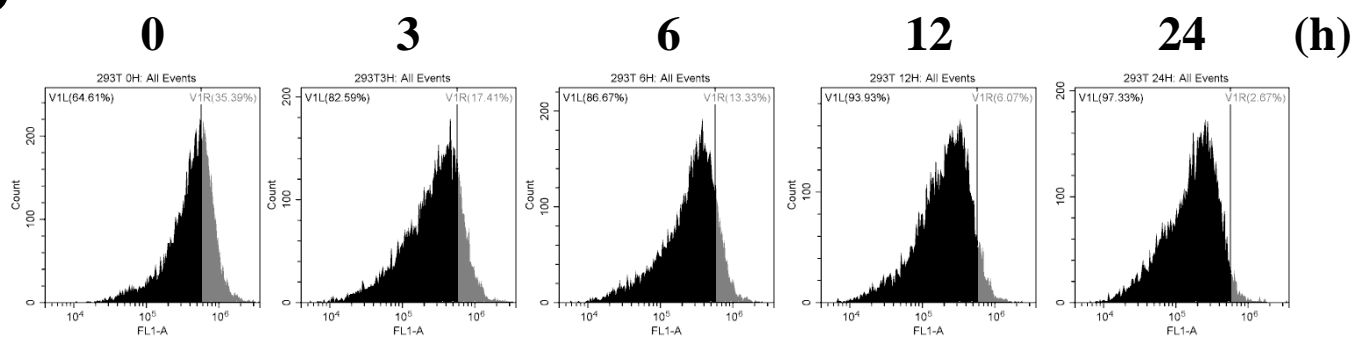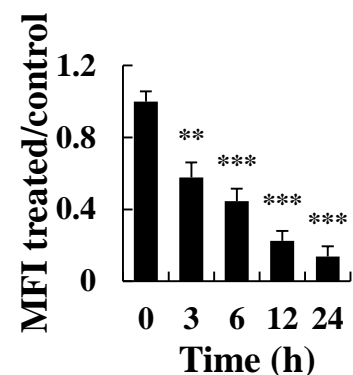

Determine the effect of calycosin on intracellular ROS level of normal cells.
